# Supplementary material
Source: PubMed Central journal article supplement (PMC4657842)
Supplement: ASN.2014121211_ASN2014121211SupplementaryData.pdf [file ASN.2014121211_ASN2014121211SupplementaryData.pdf]

# Renal Mechanisms of Association between Fibroblast Growth Factor 1 and Blood Pressure

## Supplement

Maciej Tomaszewski<sup>1,2</sup>, James Eales<sup>1</sup>, Matthew Denniff<sup>1</sup>, Stephen Myers<sup>3</sup>, Guat Siew Chew<sup>3</sup>, Christopher P Nelson<sup>1,2</sup>, Paraskevi Christofidou<sup>1</sup>, Aishwarya Desai<sup>1</sup>, Cara Büsst<sup>4</sup>, Lukasz Wojnar<sup>5</sup>, Katarzyna Musialik<sup>6</sup>, Jacek Jozwiak<sup>7</sup>, Radoslaw Debiec<sup>1</sup>, Anna F. Dominiczak<sup>8</sup>, Gerjan Navis<sup>9</sup>, Wiek H van Gilst<sup>10</sup>, Pim van der Harst<sup>1,10,11</sup>, Nilesh J Samani<sup>1,2</sup>, Stephen Harrap<sup>4</sup>, Pawel Bogdanski<sup>6</sup>, Ewa Zukowska-Szczechowska<sup>12</sup>, Fadi J Charchar<sup>1,3</sup>

<sup>1</sup> Department of Cardiovascular Sciences, University of Leicester, Leicester, UK

<sup>2</sup> NIHR Biomedical Research Centre in Cardiovascular Disease, Leicester, UK

<sup>3</sup> Faculty of Science and Technology, Federation University Australia, Ballarat, Australia

<sup>4</sup> Department of Physiology, University of Melbourne, Melbourne, Australia

<sup>5</sup> Department of Urology and Oncological Urology, Poznan University of Medical Sciences, Poznan, Poland

<sup>6</sup> Department of Education and Obesity Treatment and Metabolic Disorders, Poznan University of Medical Sciences, Poznan, Poland

<sup>7</sup> Department of Public Health, Czestochowa University of Technology, Czestochowa, Poland

<sup>8</sup> Institute of Cardiovascular and Medical Sciences, University of Glasgow, Glasgow, UK

<sup>9</sup> Department of Internal Medicine, University Medical Center Groningen, University of Groningen, Groningen, the Netherlands

<sup>10</sup> Department of Cardiology, University Medical Center Groningen, University of Groningen, Groningen, the Netherlands

<sup>11</sup> Durrer Center for Cardiogenetic Research, ICIN-Netherlands Heart Institute, Utrecht, the Netherlands

<sup>12</sup> Department of Internal Medicine, Diabetology and Nephrology, Medical University of Silesia, Zabrze, Poland

## Extended methods section

### *Populations*

#### Silesian Cardiovascular Study (SCS)

SCS is a cohort of 1138 individuals (213 families with 703 subjects and 435 subjects with no families) recruited in Southern Poland through index patients (in families – parents) with high cardiovascular risk (defined as hypertension and/or coronary artery disease and/or clustering of multiple cardiovascular risk factors), as reported before (1). Each subject underwent thorough clinical, anthropometric, and biochemical phenotyping (1). Oscillometric blood pressure (BP) measurements were conducted in triplicate and 3 readings were averaged in to estimate the final systolic BP (SBP) and diastolic BP (DBP). All biologically unrelated individuals (807 subjects) from the previous fibroblast growth factor pathway study (2) were included in this analysis. A total of 764 individuals with complete genotype and phenotype information were included in the association analysis.

#### The Victorian Family Heart Study (VFHS)

This cohort of families of white European ancestry was recruited from the general population of Victoria (Australia) (3). Each of 783 nuclear families consisted of both parents (aged 40-70 years) and at least one natural offspring (aged 18-30 years). Phenotyping included taking medical history, clinical examination, and blood biochemistry (3). Supine BP was measured after resting (for at least 10 minutes) using standard sphygmomanometry. Of three BP measurements taken, the last two were recorded and averaged in calculation of the final SBP and DBP values. A total of 2755 individuals with full genotypic and phenotypic information were included in the genetic association analysis.

#### Prevention of Renal and Vascular End-stage Disease (PREVEND) Study

PREVEND cohort consists of biologically unrelated individuals from the adult (age range: 28-75 years) general population of Groningen (the Netherlands) unselected for hypertension but enriched for microalbuminuria, as reported before (4-5). In brief, 40856 subjects who responded to invitation to participate were screened for microalbuminuria. A total of 7768 individuals with urinary albumin concentration of  $\geq 10$  mg/L together with 3395 subjects randomly selected from amongst those who had urinary albumin concentration of  $< 10$  mg/L were invited for further investigations in an outpatient clinic (4-5). A total of 8592 subjects who completed the screening program were included in the study group. Of those individuals of non-European ancestry and those with missing DNA were excluded prior to genotyping. BP was measured automatically in a supine position using automatic method (Dinamap XL Model 9300) during 2 clinic appointments. The mean of the last two measurements taken at the two visits was used in calculation of the final SBP and DBP values (4-5). Complete genotype and phenotype information was available for 7687 individuals.

#### Genetic Regulation of Arterial Pressure of Humans in the Community (GRAPHIC) Study

The details of recruitment, phenotyping and general clinical characteristics of GRAPHIC subjects were reported before (6-7). In brief, white British nuclear families with both parents (aged 40-60 years) and two adult offspring (aged  $\geq 18$  years) were identified through general practices in Leicestershire (UK) and invited to participate. There were no exclusion criteria apart from a known history of renal disease. A total of 2037 subjects from 520 nuclear families underwent detailed clinical phenotyping including medical history, anthropometric measurements, extensive blood biochemistry, along with BP measurements (7). Clinic BP was measured in triplicate using automatic device (Omron HEM-705CP monitors) and the mean of the second and third readings was used in calculation of the final values of SBP and DBP. A total of 1987 individuals with complete genetic and phenotypic data were included in the association analysis.

#### Young Men Cardiovascular Association (YMCA) Study

This cohort of 1157 young (average age: 19 years) men was recruited in Silesia (Southern Poland) (8). In brief, apparently healthy men of white European ancestry with no prior history of cardiovascular disease (apart from hypertension) were recruited from secondary schools of Silesia. As a part of phenotyping demographic and clinical information was collected using standardised coded questionnaires prior to anthropometric measurements and biochemical analyses (8). BP was measured

in a sitting position using calibrated mercury sphygmomanometer (8). Three readings were averaged in calculation of the final SBP and DBP values (8-9). A total of 1151 men were fully informative in the genetic association analysis.

#### TRANScriptome of renal human Tissue (TRANSLATE) Study

TRANSLATE Study provided human kidney samples both for quantitative real-time PCR analysis of FGF1 (n=133) and the discovery phase of the next-generation RNA-sequencing analysis (n=32).

Human kidney samples from the TRANSLATE Study were collected after surgery in 133 patients who underwent elective unilateral nephrectomy because of non-invasive renal cancer in one of three nephrology-urology centres [Silesian Renal Tissue Bank (2,10), TRANSLATE P (recruitment conducted in Western Poland) and TRANSLATE Z (recruitment conducted in Southern Poland)]. Small fragments of kidney tissues were collected from healthy (unaffected by cancer) pole of the kidney and immersed in RNAlater (Ambion, Austin, TX) immediately after nephrectomy (2). Each subject underwent standardised clinical phenotyping, including personal history (through anonymous coded questionnaires), anthropometry (weight, height) and triplicate measurements of BP using a mercury sphygmomanometer (in a subset of samples – Silesian Renal Tissue Bank) (2,10) or automatic digital BP monitoring (in the rest of the patients). Diagnosis of hypertension was based on BP values  $\geq 140/90$  mmHg (measured on at least two separate occasions) and/or being on pharmacological anti-hypertensive treatment.

All recruited individuals were of white European ancestry.

#### *RNA analysis*

##### Renal expression of FGF1 mRNA - SYBR® Green-based real-time quantitative PCR

The sequences of human FGF1 mRNA was obtained from Ensembl database. Primer3Plus software (<http://www.bioinformatics.nl/cgi-bin/primer3plus/primer3plus.cgi>) and PrimerQuest (<https://www.idtdna.com/Scitools/Applications/Primerquest/Default.aspx>) were used to design primers for total FGF1 - the primers were designed based on the sequence of the first coding exon of FGF1 and capture all other known transcripts. Quantitative real-time PCR (qPCR) of renal samples from TRANSLATE Study was performed on Eppendorf Realplex PCR equipment (Eppendorf, Sydney, Australia). The experiments were conducted using 5  $\mu$ l SensiMix SYBR No-ROX (Bioline, Sydney, Australia), 0.25  $\mu$ l of each specific primer (GeneWorks, Adelaide, South Australia), 1  $\mu$ l of renal cDNA (100 ng) and H<sub>2</sub>O to a final 10  $\mu$ l volume. qPCR was carried out over 45 cycles of 95°C for 15 sec, 57°C for 15 sec, and 72°C for 15 sec. The relative level of target gene expression was normalized to 18s ribosomal RNA.

##### Sequencing library preparation - TRANSLATE Study

Sequencing libraries were generated from 1  $\mu$ g of total RNA for each sample following the Illumina TruSeq RNA sample preparation guide version 2 protocol. This protocol included poly-A transcript selection (via oligo-dT beads) and random hexamer primed first strand cDNA synthesis.

#### *Statistical and bioinformatics analysis*

##### Genetic association analysis

The concordance of rs152524 single nucleotide polymorphism (SNP) genotypes distribution with Hardy-Weinberg equilibrium was examined using a  $\chi^2$  test under the previously used threshold of  $P < 0.01$  (2,10).

Prior to association analysis, a correction for BP lowering effect of antihypertensive medication was applied - in all patients on pharmacological treatment a constant of 15 mmHg and 10 mmHg was added to measured SBP and DBP (respectively), similar to the algorithm used by International Consortium for Blood Pressure Genome-Wide Association Studies (9).

The analysis of association between BP and rs152524 in biologically unrelated subjects (SCS, PREVEND, YMCA) was conducted by linear regression under additive model of inheritance (coded as 0, 1 or 2 major allele copies). The regression models were constructed in PLINK and adjusted for age and sex (11). In VFHS families the association analysis was examined under the same model of inheritance using the PLINK family-based test for quantitative traits (QFAM) (12). The QFAM

regressed age, age<sup>2</sup> and sex-adjusted SBP and DBP on rs152524 genotype and corrected for family structure using adaptive permutations (12). The association analysis in the GRAPHIC cohort was carried out by GEMMA software that uses Mixed Model Association algorithm for a standard linear mixed model and some of its close relatives (13). GEMMA fitted linear mixed models (LMM) for association tests of rs152524 with SBP and DBP (accounting for family structure) In GRAPHIC Study. The analysis was also adjusted for age, age<sup>2</sup> and sex.

In all models  $\beta$ -coefficients along with the respective standard errors (SE) were calculated per each major allele copy of rs152524. Inverse variance weighted averages of  $\beta$ -coefficients and SE from all populations were pooled together in fixed effects meta-analysis. A combined effect size estimates and respective p-values were calculated for the effective sample of 14364 individuals under additive model of inheritance using METAL software (<http://www.sph.umich.edu/csg/abecasis/metal/index.html>). The between-study heterogeneity was computed using  $\chi^2$ -test.

#### rs152524 – renal FGF1 mRNA association analysis

The compatibility of rs152524 genotypes distribution with Hardy–Weinberg Equilibrium was tested by  $\chi^2$  test. The effect of rs152524 on renal expression of total FGF1 mRNA was examined by regressing the qPCR-derived measure on rs152524 genotype (coded as 0, 1 or 2 major allele copies). The analysis was conducted by stepwise regression with clinical (age, sex, body mass index – BMI, hypertension) and technical (cohort origin, qPCR experiment) variables entered into the model under the criteria of F-statistic (Probability-of-F-to-enter  $\leq 0.15$ , Probability-of-F-to-remove  $\geq 0.2$ ). Relative differences in expression of total FGF1 between rs152524 genotypes were calculated using  $2^{-\Delta\Delta C_T}$  formula (14) whereby  $\Delta C_T$  were residuals for qPCR-derived total FGF1 measures (delta cycle thresholds) from stepwise linear regression. Rare homozygous genotype was used as a baseline reference. A total of 126 samples were fully informative in genetic-mRNA association analysis.

#### rs152524 – regulatory analysis *in silico*

We investigated the regulatory potential of rs152524 single nucleotide polymorphism (SNP) and its statistical proxies [SNPs in high linkage disequilibrium coefficient ( $r^2 > 0.8$ ) with rs152524]. We queried HaploReg v3, a tool that identifies SNPs and their proxies that overlap with regulatory regions, for all SNPs showing  $r^2$ -coefficient of at least 0.8 with rs152524. The information on transcriptional enhancer regions mapping to FGF1, patterns of histone modification, DNase I hypersensitive sites and transcription factor binding motifs was obtained from Roadmap Epigenomics (15) and ENCODE (16) database.

#### Next-generation RNA-sequencing - TRANSLATE and The Cancer Genome Atlas (TCGA)

A total of 32 human kidney cDNA libraries from the TRANSLATE study were sequenced on an Illumina HiSeq 2000 using 100bp pair-end reads. This resulted in 4.4Gb ( $\pm 0.48$ ) of mapped sequence data per sample. Given an estimated expressed renal transcriptome size of 61.2Mb (see filtering below), the average coverage across the transcriptome is 73x.

Raw reads were quality checked using FastQC (17); post-alignment, the squared coefficient of variation and expression dispersion estimates were assessed using CummeRbund. Reads were filtered and aligned by TopHat v2.0.1 to the Ensembl GRCh37 reference genome using Ensembl v70 transcript annotations. Cuffdiff v2.1.1 was used to quantify the Ensembl v70 reference transcriptome. An assessment of background gene expression noise in the dataset was determined using repeat quantification of Ensembl gene structures randomly moved to intergenic locations throughout the genome. These quantifications were used to determine a lower cutoff of 0.128 FPKM which accounts for 95% of all non-reference genic expression across the dataset. All transcripts expressed above the lower cutoff in 50% or more of the samples were analysed further. Cuffdiff quantifications were converted into transcripts per million (TPM) units and then log<sub>2</sub> transformed after adding a constant of 1 (i.e. A TPM of 0 stays at that value after log transformation). Logged TPM values were then adjusted using 5 hidden factors defined by probabilistic estimation of expression residuals (PEER), using the approach defined earlier (18-19).

TCGA sample fastq files were downloaded from CGHub (under agreement 26966-1). The TCGA samples were sequenced using 50bp paired end reads on an Illumina HiSeq 2000. The raw reads were aligned, and transcript expression was quantified, in the same manner as for TRANSLATE. TCGA samples were sequenced to greater depth, with 6.8Gb ( $\pm 1.5$ Gb) of mapped sequence data per sample giving an average coverage across the transcriptome of 111x (assuming a 61.2Mb transcriptome).

Linear correlations between mRNA isoforms of FGF1 expressed in the kidney were examined by Pearson's linear correlation. The analysis of co-expression between FGF1 mRNA and renal transcripts was conducted using multiple linear regression models whereby individual transcripts were independent variables and FGF1 mRNA abundance (expressed in TPM units), age, sex and BMI – dependent parameters. This analysis was followed by collapsing significantly associated mRNA isoforms into genes they originate from. The obtained regression coefficients with the respective SE and levels of statistical significance were used as measures of co-expression between FGF1 and other mRNA. The correction for multiple testing was applied by estimating the false discovery rate (FDR). We used an FDR lower threshold of  $q=0.001$  (0.1%) for detection of statistically significant co-expressed transcripts, genes and collapsed genes. Circle plots were produced using circos (20) to visualise levels of co-expression between FGF1 and correlated transcripts.

Differences in renal expression of total FGF1 mRNA and its mRNA isoforms between hypertensive and normotensive kidneys from TRANSLATE Study were calculated by linear regression with mRNA expression measures (expressed in TPM) as the dependant variable and age, sex, BMI and hypertensive status as independent parameters. Analysis of association between mRNAs and BP in the TRANSLATE Study was conducted by the linear regression with SBP/DBP as dependent variable and individual mRNAs (or genes where appropriate) expression measures obtained from next generation RNA-sequencing, age, sex and BMI as independent parameters.

#### Biochemical analysis

Serum levels of natriuretic peptides (proANP and BNP) measured in 32 individuals included in RNA-seq were normalised by inverse transformation prior to further association studies. Renal expression measures of FGF1 mRNA were obtained from next generation RNA-seq. Analysis of association between natriuretic peptides and FGF1 expression in the kidney was conducted by stepwise linear regression equations whereby natriuretic peptides levels were independent phenotypes and FGF1 mRNA, age, sex, and BMI – independent variables. The independent parameters were entered in the regression models based on F-statistic criterion (Probability-of-F-to-enter  $\leq 0.25$ , Probability-of-F-to-remove  $\geq 0.30$ ).

### Supplementary Tables

Table S1. Allele frequencies of rs152524 single nucleotide polymorphism in FGF1.

| Study     | Minor allele frequency (G) | Major allele frequency (A) |
|-----------|----------------------------|----------------------------|
| SCS       | 0.45                       | 0.55                       |
| VFHS      | 0.43                       | 0.57                       |
| PREVEND   | 0.45                       | 0.55                       |
| GRAPHIC   | 0.43                       | 0.57                       |
| YMCA      | 0.45                       | 0.55                       |
| TRANSLATE | 0.36                       | 0.64                       |

SCS – Silesian Cardiovascular Study, VFHS – Victorian Family Heart Study, PREVEND – Prevention of Renal and Vascular End-stage Disease Study, GRAPHIC – Genetic Regulation of Arterial Pressure of Humans in the Community Study, YMCA – Young Men Cardiovascular Association Study, TRANSLATE – TRANScriptome of renaL humAn TissuE Study; in family-based studies allele frequencies were calculated based on the data from parental generation

Table S2. Regulatory regions overlapping with rs152524 and its proxies in Roadmap Epigenomics and ENCODE.

| SNP      | r <sup>2</sup> | Tissue/Cell type                                                           | Regulatory region type           | Data source         |
|----------|----------------|----------------------------------------------------------------------------|----------------------------------|---------------------|
| rs152524 | -              | adipose derived mesenchymal stem cell cultured cells                       | weak enhancer                    | Roadmap Epigenomics |
| rs152524 | -              | brain angular gyrus                                                        | enhancer-like transcribed region | Roadmap Epigenomics |
| rs152524 | -              | imr90 cell line                                                            | active enhancer                  | Roadmap Epigenomics |
| rs152524 | -              | hesc derived cd56+ mesoderm cultured cells                                 | weak enhancer                    | Roadmap Epigenomics |
| rs152524 | -              | penis foreskin fibroblast primary cells.donor skin02                       | transcription enhancer-like      | Roadmap Epigenomics |
| rs152524 | -              | brain cingulate gyrus                                                      | transcription enhancer-like      | Roadmap Epigenomics |
| rs152524 | -              | fetal muscle trunk                                                         | DNase I hypersensitive site      | Roadmap Epigenomics |
| rs152524 | -              | fetal muscle leg                                                           | DNase I hypersensitive site      | Roadmap Epigenomics |
| rs152524 | -              | T cell (leukaemia line)                                                    | Enhancer                         | Ensembl VEP         |
| rs152524 | -              | mammary epithelial cells                                                   | Enhancer                         | Ensembl VEP         |
| rs152524 | -              | skeletal muscle myoblasts                                                  | Enhancer                         | Ensembl VEP         |
| rs152524 | -              | fetal lung fibroblasts                                                     | Enhancer                         | Ensembl VEP         |
| rs152524 | -              | astrocytes                                                                 | Enhancer                         | Ensembl VEP         |
| rs152524 | -              | adult dermal fibroblasts                                                   | Enhancer                         | Ensembl VEP         |
| rs152524 | -              | epidermal keratinocytes                                                    | Enhancer                         | Ensembl VEP         |
| rs152524 | -              | lung fibroblasts                                                           | Enhancer                         | Ensembl VEP         |
| rs152524 | -              | osteoblasts                                                                | Enhancer                         | Ensembl VEP         |
| rs34012  | 0.92           | fetal brain                                                                | weak enhancer                    | Roadmap Epigenomics |
| rs34012  | 0.92           | fetal brain                                                                | DNase I hypersensitive site      | Roadmap Epigenomics |
| rs249925 | 0.85           | left ventricle                                                             | active enhancer                  | Roadmap Epigenomics |
| rs249925 | 0.85           | chondrocytes from bone marrow derived mesenchymal stem cell cultured cells | weak enhancer                    | Roadmap Epigenomics |
| rs249925 | 0.85           | stomach mucosa                                                             | weak enhancer                    | Roadmap Epigenomics |
| rs34005  | 0.8            | mesenchymal stem cell derived adipocyte cultured cells                     | weak enhancer                    | Roadmap Epigenomics |
| rs34005  | 0.8            | adipose derived mesenchymal stem cell cultured cells                       | weak enhancer                    | Roadmap Epigenomics |
| rs34005  | 0.8            | muscle satellite cultured cells                                            | active enhancer                  | Roadmap Epigenomics |
| rs34005  | 0.8            | penis foreskin fibroblast primary cells                                    | weak enhancer                    | Roadmap Epigenomics |

|         |     |                                                |                 |                        |
|---------|-----|------------------------------------------------|-----------------|------------------------|
| rs34005 | 0.8 | hesc derived cd184+<br>endoderm cultured cells | weak enhancer   | Roadmap<br>Epigenomics |
| rs34005 | 0.8 | brain cingulate gyrus                          | active enhancer | Roadmap<br>Epigenomics |
| rs34005 | 0.8 | pancreatic islets                              | weak enhancer   | Roadmap<br>Epigenomics |
| rs34005 | 0.8 | brain substantia nigra                         | weak enhancer   | Roadmap<br>Epigenomics |
| rs34005 | 0.8 | penis foreskin melanocyte<br>primary cells     | weak enhancer   | Roadmap<br>Epigenomics |
| rs34005 | 0.8 | mammary epithelial cells                       | weak enhancer   | ENCODE                 |
| rs34005 | 0.8 | lung fibroblasts                               | weak enhancer   | ENCODE                 |

SNP – single nucleotide polymorphism,  $r^2$  – measure of linkage disequilibrium with rs152524 in CEU population, VEP – Variant Effect Predictor

Table S3. Demographic and clinical characteristics of individuals from TRANSLATE Study and TCGA resource included in next generation RNA-sequencing experiment.

| Variable                             | TRANSLATE  | TCGA      |
|--------------------------------------|------------|-----------|
| Number of subjects                   | 32         | 70        |
| M/F                                  | 19/13      | 51/19     |
| Age (years)                          | 59.0±7.6   | 62.9±12.0 |
| Body mass index (kg/m <sup>2</sup> ) | 26.9±4.4   | N/A       |
| Clinic SBP (mmHg)                    | 140.1±15.4 | N/A       |
| Clinic DBP (mmHg)                    | 88.0±7.7   | N/A       |
| Hypertension (%)                     | 18 (50.0)  | N/A       |
| Antihypertensive treatment (%)       | 14 (43.8)  | N/A       |

Data are counts and percentages or means and standard deviations, SBP – systolic blood pressure, DBP – diastolic blood pressure, TRANSLATE – TRANScriptome of renaL humAn TissuE Study, TCGA – Tissue Cancer Genome Atlas, N/A – not available

Table S4. Linear correlation in renal expression of FGF1 mRNA isoforms in TRANSLATE Study – next-generation RNA-sequencing analysis.

|            | FGF1-001                       | FGF1-003                       | FGF1-006                       |
|------------|--------------------------------|--------------------------------|--------------------------------|
| FGF1 total | $r=0.95, P<2.2\times 10^{-16}$ | $r=0.97, P<2.2\times 10^{-16}$ | $r=0.95, P<2.2\times 10^{-16}$ |
| FGF1-001   | -                              | $r=0.86, P=4.6\times 10^{-11}$ | $r=0.82, P=3.3\times 10^{-9}$  |
| FGF1-003   | -                              | -                              | $r=0.94, P<2.2\times 10^{-16}$ |

Data are Pearson's correlation coefficient (r) and levels of statistical significance (P-values), TRANSLATE – TRANScriptome of renaL humAn TissuE Study

Table S5. Linear correlation in expression of FGF1 mRNA isoforms in TCGA – next-generation RNA-sequencing analysis.

|            | FGF1-001                       | FGF1-003                       | FGF1-006                       |
|------------|--------------------------------|--------------------------------|--------------------------------|
| FGF1 total | $r=0.99, P<2.2\times 10^{-16}$ | $r=0.96, P<2.2\times 10^{-16}$ | $r=0.96, P<2.2\times 10^{-16}$ |
| FGF1-001   | -                              | $r=0.92, P<2.2\times 10^{-16}$ | $r=0.93, P<2.2\times 10^{-16}$ |
| FGF1-003   | -                              | -                              | $r=0.85, P<2.2\times 10^{-16}$ |

Data are Pearson's correlation coefficient (r) and levels of statistical significance (P-values), TCGA – Tissue Cancer Genome Atlas

Table S6. Association between FGF1, its renal mRNA isoforms and hypertension in TRANSLATE Study – next-generation RNA-sequencing analysis of the human kidneys.

|            | All subjects | Normotension | Hypertension | Mean crude excess | P-value |
|------------|--------------|--------------|--------------|-------------------|---------|
| FGF1 total | 56.6±7.5     | 48.5±10.1    | 63.8±11.1    | 31.5%             | 0.041   |
| FGF1-001   | 47.6±6.2     | 40.9±8.5     | 53.6±9.0     | 31.2%             | 0.042   |
| FGF1-003   | 4.1±0.6      | 3.4±0.6      | 4.7±1.0      | 36.7%             | 0.023   |
| FGF1-006   | 4.9±0.8      | 4.2±1.1      | 5.5±1.3      | 31%               | 0.099   |

Data are means and standard errors for expression values from next generation RNA-sequencing analysis (in TPM units); mean crude excess – average expression excess in hypertension, P-value – level of statistical significance for comparison of hypertension and normotension from a linear regression model adjusted for age, sex and body mass index, TRANSLATE – TRANScriptome of renaL humAn TissuE Study

Table S7. Genes whose mRNAs are associated with renal expression of FGF1 in both TRANSLATE and TCGA Studies.

| No. | Ensembl gene ID | Gene Symbol | Gene product name                                    |
|-----|-----------------|-------------|------------------------------------------------------|
| 1   | ENSG00000213963 | AC074286.1  | Uncharacterized protein                              |
| 2   | ENSG00000168306 | ACOX2       | Acyl-CoA oxidase 2, branched chain                   |
| 3   | ENSG00000167107 | ACSF2       | Acyl-CoA synthetase family member 2                  |
| 4   | ENSG00000163631 | ALB         | Albumin                                              |
| 5   | ENSG00000136872 | ALDOB       | Aldolase B, fructose-bisphosphate                    |
| 6   | ENSG00000178038 | ALS2CL      | ALS2 C-terminal like                                 |
| 7   | ENSG00000162779 | AXDND1      | Axonemal dynein light chain domain containing 1      |
| 8   | ENSG00000112175 | BMP5        | Bone morphogenetic protein 5                         |
| 9   | ENSG00000101144 | BMP7        | Bone morphogenetic protein 7                         |
| 10  | ENSG00000139971 | C14orf37    | Chromosome 14 open reading frame 37                  |
| 11  | ENSG00000104327 | CALB1       | Calbindin 1, 28kDa                                   |
| 12  | ENSG00000070808 | CAMK2A      | Calcium/calmodulin-dependent protein kinase II alpha |
| 13  | ENSG00000213085 | CCDC19      | Coiled-coil domain containing 19                     |
| 14  | ENSG00000129757 | CDKN1C      | Cyclin-dependent kinase inhibitor 1C (p57, Kip2)     |
| 15  | ENSG00000112782 | CLIC5       | Chloride intracellular channel 5                     |
| 16  | ENSG00000148204 | CRB2        | Crumbs homolog 2 (Drosophila)                        |
| 17  | ENSG00000145708 | CRHBP       | Corticotropin releasing hormone binding protein      |
| 18  | ENSG00000160202 | CRYAA       | Crystallin, alpha A                                  |
| 19  | ENSG00000172346 | CSDC2       | Cold shock domain containing C2, RNA binding         |
| 20  | ENSG00000136943 | CTSL2       | Cathepsin L2                                         |
| 21  | ENSG00000165659 | DACH1       | Dachshund homolog 1 (Drosophila)                     |
| 22  | ENSG00000181418 | DDN         | Dendrin                                              |
| 23  | ENSG00000130226 | DPP6        | Dipeptidyl-peptidase 6                               |
| 24  | ENSG0000013016  | EHD3        | EH-domain containing 3                               |
| 25  | ENSG00000164035 | EMCN        | Endomucin                                            |
| 26  | ENSG00000120658 | ENOX1       | Ecto-NOX disulfide-thiol exchanger 1                 |
| 27  | ENSG00000187017 | ESPN        | Espin                                                |
| 28  | ENSG00000163586 | FABP1       | Fatty acid binding protein 1, liver                  |
| 29  | ENSG00000039523 | FAM65A      | Family with sequence similarity 65, member A         |
| 30  | ENSG00000155816 | FMN2        | Formin 2                                             |
| 31  | ENSG00000153303 | FRMD1       | FERM domain containing 1                             |
| 32  | ENSG00000053108 | FSTL4       | Follistatin-like 4                                   |

|    |                 |              |                                                      |
|----|-----------------|--------------|------------------------------------------------------|
| 33 | ENSG00000160282 | FTCD         | Formiminotransferase cyclodeaminase                  |
| 34 | ENSG00000130700 | GATA5        | GATA binding protein 5                               |
| 35 | ENSG00000121743 | GJA3         | Gap junction protein, alpha 3, 46kDa                 |
| 36 | ENSG00000116983 | HPCAL4       | Hippocalcin like 4                                   |
| 37 | ENSG00000158104 | HPD          | 4-hydroxyphenylpyruvate dioxygenase                  |
| 38 | ENSG00000123496 | IL13RA2      | Interleukin 13 receptor, alpha 2                     |
| 39 | ENSG00000115602 | IL1RL1       | Interleukin 1 receptor-like 1                        |
| 40 | ENSG00000027644 | INSRR        | Insulin receptor-related receptor                    |
| 41 | ENSG00000167755 | KLK6         | Kallikrein-related peptidase 6                       |
| 42 | ENSG00000169035 | KLK7         | Kallikrein-related peptidase 7                       |
| 43 | ENSG00000136944 | LMX1B        | LIM homeobox transcription factor 1, beta            |
| 44 | ENSG00000234456 | MAGI2-AS3    | MAGI2 antisense RNA 3                                |
| 45 | ENSG00000196549 | MME          | Membrane metallo-endopeptidase                       |
| 46 | ENSG00000240666 | MME-AS1      | MME antisense RNA 1                                  |
| 47 | ENSG00000205358 | MT1H         | Metallothionein 1H                                   |
| 48 | ENSG00000173376 | NDNF         | Neuron-derived neurotrophic factor                   |
| 49 | ENSG00000163531 | NFASC        | Neurofascin                                          |
| 50 | ENSG00000116044 | NFE2L2       | Nuclear factor (erythroid-derived 2)-like 2          |
| 51 | ENSG00000161270 | NPHS1        | Nephrosis 1, congenital, Finnish type (nephrin)      |
| 52 | ENSG00000116218 | NPHS2        | Nephrosis 2, idiopathic, steroid-resistant (podocin) |
| 53 | ENSG00000168743 | NPNT         | Nephronectin                                         |
| 54 | ENSG00000162631 | NTNG1        | Netrin G1                                            |
| 55 | ENSG00000138315 | OIT3         | Oncoprotein induced transcript 3                     |
| 56 | ENSG00000171759 | PAH          | Phenylalanine hydroxylase                            |
| 57 | ENSG00000067225 | PKM          | Pyruvate kinase, muscle                              |
| 58 | ENSG00000153246 | PLA2R1       | Phospholipase A2 receptor 1, 180kDa                  |
| 59 | ENSG00000128567 | PODXL        | Podocalyxin-like                                     |
| 60 | ENSG00000105227 | PRX          | Periaxin                                             |
| 61 | ENSG00000160801 | PTH1R        | Parathyroid hormone 1 receptor                       |
| 62 | ENSG00000153707 | PTPRD        | Protein tyrosine phosphatase, receptor type, D       |
| 63 | ENSG00000151490 | PTPRO        | Protein tyrosine phosphatase, receptor type, O       |
| 64 | ENSG00000164520 | RAET1E       | Retinoic acid early transcript 1E                    |
| 65 | ENSG00000143839 | REN          | Renin                                                |
| 66 | ENSG00000235366 | RP11-154C3.2 | Uncharacterized protein                              |

|    |                 |               |                                                                                                               |
|----|-----------------|---------------|---------------------------------------------------------------------------------------------------------------|
| 67 | ENSG00000256029 | RP11-190A12.7 | Uncharacterized protein                                                                                       |
| 68 | ENSG00000258283 | RP11-386G11.3 | Uncharacterized protein                                                                                       |
| 69 | ENSG00000255509 | RP11-445F12.1 | Uncharacterized protein                                                                                       |
| 70 | ENSG00000261788 | RP11-480G7.1  | Uncharacterized protein                                                                                       |
| 71 | ENSG00000230027 | RP11-550H2.2  | Uncharacterized protein                                                                                       |
| 72 | ENSG00000255895 | RP11-656E20.3 | Uncharacterized protein                                                                                       |
| 73 | ENSG00000248115 | RP11-752D24.2 | Uncharacterized protein                                                                                       |
| 74 | ENSG00000263146 | RP11-849I19.1 | Uncharacterized protein                                                                                       |
| 75 | ENSG00000259969 | RP11-999E24.3 | Uncharacterized protein                                                                                       |
| 76 | ENSG00000243988 | RPS24P17      | Ribosomal protein S24 pseudogene 17                                                                           |
| 77 | ENSG00000136546 | SCN7A         | Sodium channel, voltage-gated, type VII, alpha subunit                                                        |
| 78 | ENSG00000100665 | SERPINA4      | Serpin peptidase inhibitor, clade A (alpha-1 antiproteinase, antitrypsin), member 4                           |
| 79 | ENSG00000074803 | SLC12A1       | Solute carrier family 12 (sodium/potassium/chloride transporters), member 1                                   |
| 80 | ENSG00000070915 | SLC12A3       | Solute carrier family 12 (sodium/chloride transporters), member 3                                             |
| 81 | ENSG00000149452 | SLC22A8       | Solute carrier family 22 (organic anion transporter), member 8                                                |
| 82 | ENSG00000091137 | SLC26A4       | Solute carrier family 26, member 4                                                                            |
| 83 | ENSG00000186335 | SLC36A2       | Solute carrier family 36 (proton/amino acid symporter), member 2                                              |
| 84 | ENSG00000186198 | SLC51B        | Solute carrier family 51, beta subunit                                                                        |
| 85 | ENSG00000010379 | SLC6A13       | Solute carrier family 6 (neurotransmitter transporter, GABA), member 13                                       |
| 86 | ENSG00000092068 | SLC7A8        | Solute carrier family 7 (amino acid transporter light chain, L system), member 8                              |
| 87 | ENSG00000137834 | SMAD6         | SMAD family member 6                                                                                          |
| 88 | ENSG00000167941 | SOST          | Sclerostin                                                                                                    |
| 89 | ENSG00000107742 | SPOCK2        | Sparc/osteonectin, cwcv and kazal-like domains proteoglycan (testican) 2                                      |
| 90 | ENSG00000184005 | ST6GALNAC3    | ST6 (alpha-N-acetyl-neuraminyl-2,3-beta-galactosyl-1,3)-N-acetylgalactosaminide alpha-2,6-sialyltransferase 3 |
| 91 | ENSG00000118526 | TCF21         | Transcription factor 21                                                                                       |
| 92 | ENSG00000261787 | TCF24         | Transcription factor 24                                                                                       |
| 93 | ENSG00000069702 | TGFBR3        | Transforming growth factor, beta receptor III                                                                 |
| 94 | ENSG00000165685 | TMEM52B       | Transmembrane protein 52B                                                                                     |
| 95 | ENSG00000159173 | TNNI1         | Troponin I type 1 (skeletal, slow)                                                                            |
| 96 | ENSG00000118194 | TNNT2         | Troponin T type 2 (cardiac)                                                                                   |
| 97 | ENSG00000134198 | TSPAN2        | Tetraspanin 2                                                                                                 |
| 98 | ENSG00000092445 | TYRO3         | TYRO3 protein tyrosine kinase                                                                                 |
| 99 | ENSG00000243284 | VSIG8         | V-set and immunoglobulin domain containing 8                                                                  |

|     |                 |      |                                       |
|-----|-----------------|------|---------------------------------------|
| 100 | ENSG00000060237 | WNK1 | WNK lysine deficient protein kinase 1 |
| 101 | ENSG00000184937 | WT1  | Wilms tumor 1                         |

TRANSLATE – TRANScriptome of renaL humAn TissuE Study, TCGA – Tissue Cancer Genome Atlas

Table S8. Associations between clinic blood pressure and non-FGF1 mRNAs co-expressed with FGF1 – next-generation RNA-sequencing analysis in TRANSLATE Study.

| No | Transcript name | Ensembl transcript ID | SBP                |         | DBP                |         |
|----|-----------------|-----------------------|--------------------|---------|--------------------|---------|
|    |                 |                       | B-coefficient (SE) | P-value | B-coefficient (SE) | P-value |
| 1  | AC074286.1-001  | ENST00000397057       | 0.35 (0.09)        | 0.0005  | 0.56 (0.14)        | 0.0003  |
| 2  | AC074286.1-004  | ENST00000430416       | 0.21 (0.13)        | 0.108   | 0.41 (0.19)        | 0.0422  |
| 3  | AC074286.1-005  | ENST00000443132       | 0.11 (0.04)        | 0.0121  | 0.20 (0.07)        | 0.0057  |
| 4  | ACOX2-013       | ENST00000481527       | 0.74 (0.26)        | 0.0092  | 1.08 (0.42)        | 0.0161  |
| 5  | ALB-006         | ENST00000484992       | 1.06 (0.50)        | 0.0448  | 1.80 (0.79)        | 0.0295  |
| 6  | ALDOB-001       | ENST00000374855       | 352.84 (122.70)    | 0.0074  | 437.69 (203.88)    | 0.0402  |
| 7  | AXDND1-006      | ENST00000489080       | 0.50 (0.17)        | 0.0065  | 0.76 (0.27)        | 0.0089  |
| 8  | C14orf37-001    | ENST00000267485       | 0.03 (0.02)        | 0.0498  | 0.04 (0.03)        | 0.1244  |
| 9  | CALB1-001       | ENST00000265431       | 13.85 (4.67)       | 0.006   | 22.86 (7.28)       | 0.0038  |
| 10 | CAMK2A-001      | ENST00000348628       | 0.01 (0.00)        | 0.0474  | 0.01 (0.01)        | 0.0863  |
| 11 | CLIC5-003       | ENST00000339561       | 0.52 (0.21)        | 0.0215  | 0.71 (0.35)        | 0.0494  |
| 12 | CLIC5-201       | ENST00000544153       | 0.02 (0.01)        | 0.0122  | 0.02 (0.01)        | 0.0692  |
| 13 | CRB2-201        | ENST00000373629       | 0.03 (0.01)        | 0.0326  | 0.04 (0.02)        | 0.0368  |
| 14 | CRHBP-001       | ENST00000274368       | 0.80 (0.23)        | 0.0014  | 0.97 (0.39)        | 0.0182  |
| 15 | CRYAA-001       | ENST00000291554       | 6.58 (2.53)        | 0.0145  | 10.39 (4.00)       | 0.0144  |
| 16 | CRYAA-004       | ENST00000398132       | 2.50 (0.77)        | 0.0028  | 4.07 (1.20)        | 0.0019  |
| 17 | CRYAA-005       | ENST00000468016       | 3.11 (1.01)        | 0.0045  | 4.73 (1.61)        | 0.0064  |
| 18 | DACH1-001       | ENST00000305425       | 0.04 (0.02)        | 0.0172  | 0.06 (0.03)        | 0.0551  |
| 19 | DDN-001         | ENST00000421952       | 0.22 (0.09)        | 0.0193  | 0.35 (0.14)        | 0.02    |
| 20 | DPP6-001        | ENST00000404039       | 0.06 (0.03)        | 0.0334  | 0.08 (0.04)        | 0.0434  |
| 21 | EHD3-001        | ENST00000322054       | 0.18 (0.08)        | 0.0228  | 0.24 (0.12)        | 0.0604  |
| 22 | EHD3-201        | ENST00000541626       | 0.11 (0.04)        | 0.0128  | 0.15 (0.07)        | 0.0306  |
| 23 | FMN2-001        | ENST00000319653       | 0.01 (0.00)        | 0.0103  | 0.02 (0.01)        | 0.0085  |
| 24 | IL1RL1-002      | ENST00000311734       | 0.13 (0.06)        | 0.0554  | 0.23 (0.10)        | 0.0245  |
| 25 | INSRR-001       | ENST00000368195       | 0.03 (0.01)        | 0.0216  | 0.05 (0.02)        | 0.0271  |
| 26 | KLK6-003        | ENST00000376851       | 0.19 (0.08)        | 0.0289  | 0.32 (0.13)        | 0.0184  |
| 27 | KLK7-001        | ENST00000595820       | 0.04 (0.02)        | 0.0226  | 0.06 (0.03)        | 0.0502  |
| 28 | LMX1B-202       | ENST00000425646       | 0.02 (0.01)        | 0.0175  | 0.03 (0.01)        | 0.0403  |
| 29 | MAGI2-AS3-002   | ENST00000429408       | 0.01 (0.00)        | 0.0332  | 0.01 (0.01)        | 0.0993  |
| 30 | MAGI2-AS3-003   | ENST00000414797       | 0.11 (0.04)        | 0.0046  | 0.17 (0.06)        | 0.0065  |

|    |                   |                 |              |        |               |        |
|----|-------------------|-----------------|--------------|--------|---------------|--------|
| 31 | MAGI2-AS3-007     | ENST00000452320 | 0.11 (0.04)  | 0.013  | 0.17 (0.07)   | 0.0168 |
| 32 | MME-001           | ENST00000460393 | 3.84 (1.53)  | 0.0175 | 5.66 (2.44)   | 0.0276 |
| 33 | MME-003           | ENST00000382989 | 0.12 (0.05)  | 0.0176 | 0.16 (0.08)   | 0.038  |
| 34 | MME-AS1-001       | ENST00000484721 | 1.30 (0.43)  | 0.0055 | 1.98 (0.69)   | 0.0074 |
| 35 | NDNF-001          | ENST00000379692 | 0.38 (0.14)  | 0.0092 | 0.64 (0.21)   | 0.0054 |
| 36 | NFASC-205         | ENST00000367169 | 0.05 (0.02)  | 0.019  | 0.07 (0.03)   | 0.0347 |
| 37 | NFE2L2-015        | ENST00000588123 | 0.19 (0.06)  | 0.0053 | 0.32 (0.10)   | 0.0022 |
| 38 | NPHS1-001         | ENST00000378910 | 0.54 (0.23)  | 0.0289 | 0.85 (0.37)   | 0.0296 |
| 39 | NPHS2-001         | ENST00000367615 | 2.66 (0.90)  | 0.0061 | 4.14 (1.42)   | 0.0068 |
| 40 | NPNT-001          | ENST00000379987 | 0.39 (0.17)  | 0.0315 | 0.55 (0.28)   | 0.0564 |
| 41 | NTNG1-001         | ENST00000370074 | 0.07 (0.02)  | 0.0033 | 0.10 (0.04)   | 0.0108 |
| 42 | PAH-001           | ENST00000553106 | 0.98 (0.35)  | 0.0084 | 1.52 (0.55)   | 0.0095 |
| 43 | PAH-002           | ENST00000307000 | 14.53 (5.10) | 0.0079 | 22.75 (8.07)  | 0.0085 |
| 44 | PLA2R1-001        | ENST00000283243 | 0.06 (0.03)  | 0.0462 | 0.10 (0.05)   | 0.0441 |
| 45 | PLA2R1-002        | ENST00000392771 | 0.11 (0.04)  | 0.0145 | 0.15 (0.07)   | 0.0366 |
| 46 | PODXL-201         | ENST00000537928 | 0.60 (0.28)  | 0.0379 | 0.89 (0.44)   | 0.051  |
| 47 | PTPRD-206         | ENST00000397617 | 0.06 (0.02)  | 0.0309 | 0.10 (0.04)   | 0.0131 |
| 48 | PTPRO-002         | ENST00000348962 | 0.24 (0.08)  | 0.006  | 0.36 (0.13)   | 0.0102 |
| 49 | RAET1E-003        | ENST00000532335 | 0.02 (0.01)  | 0.0085 | 0.03 (0.01)   | 0.0163 |
| 50 | RP11-154C3.2-001  | ENST00000435067 | 0.34 (0.09)  | 0.0009 | 0.51 (0.15)   | 0.0017 |
| 51 | RP11-550H2.2-001  | ENST00000434540 | 0.06 (0.03)  | 0.0873 | 0.11 (0.05)   | 0.0421 |
| 52 | RP11-656E20.3-001 | ENST00000541344 | 0.84 (0.30)  | 0.0085 | 1.18 (0.48)   | 0.0203 |
| 53 | RP11-752D24.2-001 | ENST00000510351 | 0.06 (0.02)  | 0.0162 | 0.11 (0.03)   | 0.004  |
| 54 | RP11-752D24.2-003 | ENST00000504048 | 0.05 (0.01)  | 0.0008 | 0.08 (0.02)   | 0.0004 |
| 55 | RP11-849I19.1-001 | ENST00000575722 | 0.10 (0.05)  | 0.0468 | 0.18 (0.08)   | 0.0332 |
| 56 | RP11-849I19.1-002 | ENST00000572007 | 0.07 (0.03)  | 0.0224 | 0.12 (0.05)   | 0.0114 |
| 57 | RPS24P17-001      | ENST00000479895 | 0.40 (0.14)  | 0.006  | 0.69 (0.21)   | 0.0025 |
| 58 | SCN7A-001         | ENST00000409855 | 0.01 (0.01)  | 0.0824 | 0.02 (0.01)   | 0.0408 |
| 59 | SLC12A1-010       | ENST00000559723 | 0.24 (0.11)  | 0.03   | 0.32 (0.17)   | 0.0727 |
| 60 | SLC12A3-001       | ENST00000438926 | 2.85 (0.96)  | 0.0058 | 4.74 (1.49)   | 0.0035 |
| 61 | SLC12A3-003       | ENST00000262502 | 3.02 (0.99)  | 0.0047 | 4.82 (1.55)   | 0.0042 |
| 62 | SLC12A3-007       | ENST00000563352 | 1.05 (0.38)  | 0.0095 | 1.80 (0.58)   | 0.0044 |
| 63 | SLC22A8-001       | ENST00000336232 | 18.75 (7.64) | 0.0203 | 29.80 (12.05) | 0.0194 |
| 64 | SLC36A2-201       | ENST00000450886 | 2.36 (0.92)  | 0.0156 | 3.95 (1.43)   | 0.01   |

|    |             |                 |             |        |             |        |
|----|-------------|-----------------|-------------|--------|-------------|--------|
| 65 | SLC7A8-008  | ENST00000397310 | 3.02 (1.27) | 0.0242 | 4.48 (2.03) | 0.0349 |
| 66 | SOST-001    | ENST00000301691 | 0.33 (0.13) | 0.0156 | 0.54 (0.20) | 0.0136 |
| 67 | SPOCK2-004  | ENST00000373109 | 0.02 (0.01) | 0.0182 | 0.02 (0.01) | 0.0844 |
| 68 | TCF24-001   | ENST00000563496 | 0.01 (0.00) | 0.0202 | 0.02 (0.01) | 0.0049 |
| 69 | TGFBR3-201  | ENST00000212355 | 0.15 (0.07) | 0.0396 | 0.21 (0.11) | 0.0603 |
| 70 | TMEM52B-005 | ENST00000543484 | 0.59 (0.25) | 0.0237 | 0.88 (0.39) | 0.0338 |
| 71 | TNNT2-001   | ENST00000367322 | 0.46 (0.16) | 0.0076 | 0.72 (0.25) | 0.0082 |
| 72 | TSPAN2-001  | ENST00000369516 | 0.05 (0.02) | 0.0175 | 0.07 (0.03) | 0.0457 |
| 73 | TYRO3-001   | ENST00000263798 | 0.15 (0.05) | 0.0052 | 0.24 (0.08) | 0.0049 |
| 74 | WNK1-201    | ENST00000340908 | 0.43 (0.11) | 0.0005 | 0.62 (0.18) | 0.0018 |
| 75 | WT1-004     | ENST00000452863 | 0.04 (0.02) | 0.014  | 0.06 (0.03) | 0.0244 |

Data are  $\beta$ -coefficients, standard errors (SE) and level of statistical significance (P-value) from linear regression models whereby clinic blood pressure (adjusted for treatment) was a dependent variable, and mRNA expression level (in TPM units) for individual mRNAs, age, sex and BMI were independent parameters, TRANSLATE – TRANScriptome of renaL humAn TissuE Study

Table S9. FGF1-co-expressed genes that show association with clinic blood pressure in TRANSLATE Study and have direct prior annotation to blood pressure regulation either through Gene Ontology (GO:0008217) and its ancestor terms or by manual data mining.

| No | Gene symbol | Gene name                                                         | Annotation | Relevance to blood pressure regulation                                                                                                                                                                                                                                                                                                                                                                                                                                                                                                                                                               | Direction of association with expression of FGF1 |
|----|-------------|-------------------------------------------------------------------|------------|------------------------------------------------------------------------------------------------------------------------------------------------------------------------------------------------------------------------------------------------------------------------------------------------------------------------------------------------------------------------------------------------------------------------------------------------------------------------------------------------------------------------------------------------------------------------------------------------------|--------------------------------------------------|
| 1  | MME         | Membrane metallo-endopeptidase                                    | GO         | <ul style="list-style-type: none"> <li>● glycoprotein particularly abundant in kidney, where it is present on glomerular epithelium and the brush border of proximal tubules</li> <li>● acts as a neutral endopeptidase cleaving peptides at the amino side of hydrophobic residues</li> <li>● drives catabolism of vasoactive peptides involved in diuresis and natriuresis including natriuretic peptides, angiotensin I, bradykinin, and endothelin-1</li> <li>● pharmacological inhibition of MME was/is used in therapy of hypertension and heart failure (candoxatril, omapatrilat)</li> </ul> | +                                                |
| 2  | PTPRO       | Protein tyrosine phosphatase, receptor type, O                    | GO         | <ul style="list-style-type: none"> <li>● encodes a protein known as Glomerular Epithelial Protein 1</li> <li>● inhibits cell proliferation and facilitates apoptosis <ul style="list-style-type: none"> <li>● possesses tyrosine phosphatase activity</li> </ul> </li> <li>● plays a role in regulating the glomerular pressure/filtration rate relationship through an effect on podocyte structure and function</li> </ul>                                                                                                                                                                         | +                                                |
| 3  | REN         | Renin                                                             | GO         | <ul style="list-style-type: none"> <li>● rate-limiting enzyme of renin-angiotensin system - responsible for conversion of angiotensinogen into angiotensin I</li> <li>● an activator of the main pathway of blood pressure regulation</li> <li>● in the kidney expressed primarily within the juxta-glomerular apparatus (from where it is released into circulation) and the distal nephron (local renin-angiotensin system)</li> <li>● a target for pharmacological antihypertensive treatment (aliskiren)</li> </ul>                                                                              | +                                                |
| 4  | SLC12A3     | Solute carrier family 12 (sodium/chloride transporters), member 3 | Manual     | <ul style="list-style-type: none"> <li>● encodes thiazide-sensitive sodium-chloride co-transporter (NCCT)</li> <li>● key mediator of sodium and chloride reabsorption - it</li> </ul>                                                                                                                                                                                                                                                                                                                                                                                                                | +                                                |

|   |      |                                       |    |                                                                                                                                                                                                                                                                                                                                                                                                                                                                                                                                                                                                                                                         |   |
|---|------|---------------------------------------|----|---------------------------------------------------------------------------------------------------------------------------------------------------------------------------------------------------------------------------------------------------------------------------------------------------------------------------------------------------------------------------------------------------------------------------------------------------------------------------------------------------------------------------------------------------------------------------------------------------------------------------------------------------------|---|
|   |      |                                       |    | <p>accounts for a significant fraction of renal sodium reabsorption</p> <ul style="list-style-type: none"> <li>• expressed primarily within the distal portion of the tubular epithelium</li> <li>• genetic mutations in this gene are known to cause Mendelian form of low blood pressure (Gitelman syndrome)</li> <li>• a target for thiazide diuretics</li> </ul>                                                                                                                                                                                                                                                                                    |   |
| 5 | WNK1 | WNK lysine deficient protein kinase 1 | GO | <ul style="list-style-type: none"> <li>• member of the WNK (With No K, K = lysine residue) family of serine-threonine kinases</li> <li>• a key regulator of the Na-Cl co-transporter, NCCT (encoded by SLC12A3 gene) responsible for sodium reabsorption in the distal convoluted tubule and the linked process of potassium secretion by the renal outer medullary potassium channel</li> <li>• mutations in this gene are recognised cause of pseudohypoaldosteronism type 2 (PHA2), also known as Gordon's syndrome (an autosomal dominant disorder of elevated blood pressure hyperkalaemia, despite normal renal glomerular filtration)</li> </ul> | + |

GO – gene ontology, TRANSLATE – TRANScriptome of renaL humAn TissuE Study, + stands for positive

Table S10. Enrichment for glomerular expression among genes associated with renal expression of FGF1 and with the strongest relevance to blood pressure regulation.

| Number | Gene        | Glomerular enrichment | References   |
|--------|-------------|-----------------------|--------------|
|        | <b>FGF1</b> | ++++                  | <b>21-24</b> |
| 1      | MME         | ++++                  | 21-24        |
| 2      | PTPRO       | ++++                  | 21-24        |
| 3      | REN         | +                     | 23           |
| 4      | SLC12A3     |                       |              |
| 5      | WNK1        |                       |              |

+ refers to the positive enrichment in one in four referenced resources

# Supplementary Figures

Figure S1. Regional linkage disequilibrium plot of rs152524 with 1Mb-surrounding chromosomal region. On Y axis –  $r^2$  – a coefficient of linkage disequilibrium; on X axis – single nucleotide polymorphisms from 1000 Genomes pilot 1 project within 500 Kb distance on each side of rs152524 – information based on CEU population; in grey – single nucleotide polymorphisms in a weak linkage disequilibrium with rs152524; in yellow/orange – single nucleotide polymorphisms in a moderately strong linkage disequilibrium with rs152524; in red – single nucleotide polymorphisms in the highest linkage disequilibrium with rs152524; genes in the regions are shown as grey bars; above in red – gene symbols.

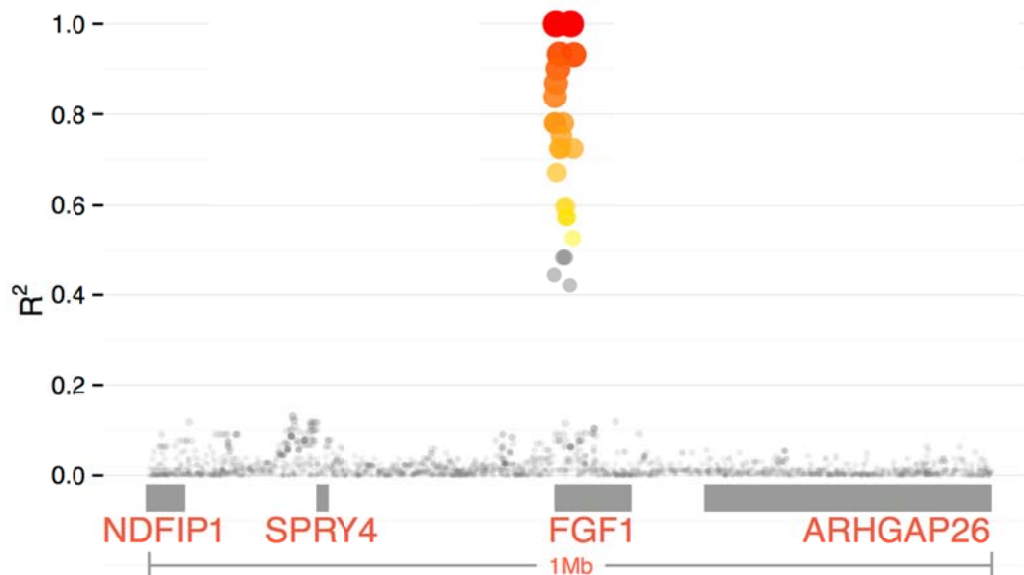

Figure S2. Partner genes of FGF1 in the kidney – next-generation RNA-sequencing in TRANScriptome of renaL humAn TissuE (TRANSLATE) Study. Outermost circle – symbols of 506 genes whose transcripts are associated with renal expression of FGF1; first circle below – level of renal expression for each partner gene (in  $\log_2$  TPM+1 values) whereby white – lowest expression and navy blue – highest expression; second circle below – level of co-expression (measured as  $\beta$ -coefficient from linear regression) between each partner gene and FGF1 whereby dark brown – strong positive co-expression and beige – weak positive co-expression; third circle below – level of statistical significance (measured as  $-\log_{10}$  P-value from linear regression) for co-expression between each partner gene and FGF1, whereby white – strong statistical significance and pink – weak statistical significance; most inner circle – level of connectivity of partner genes whereby dark red – highly connective genes, orange – genes with low connectivity.

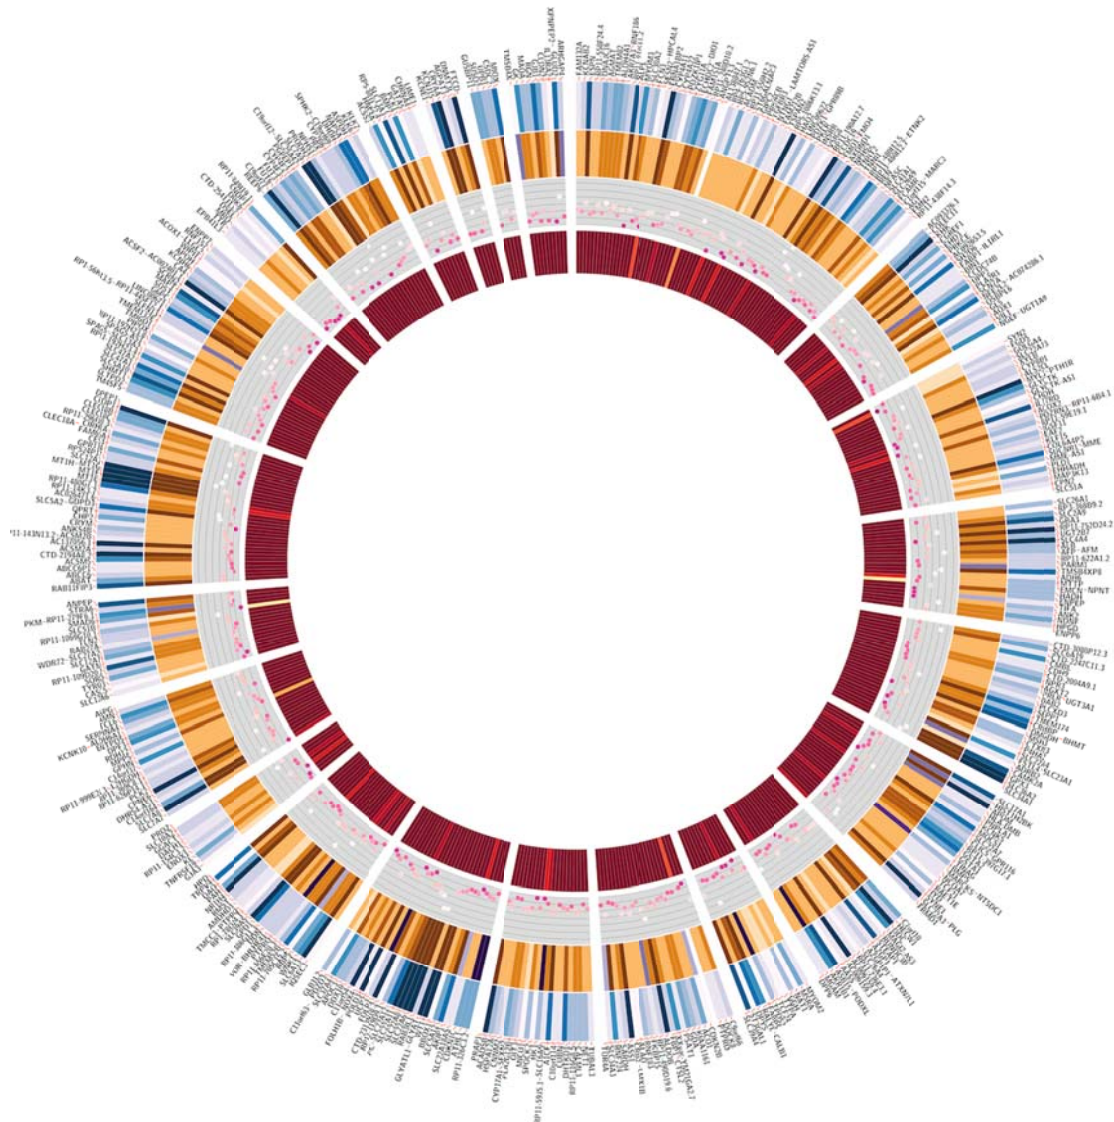

Figure S3. Replicated partner mRNAs of FGF1 in the kidney – next-generation RNA-sequencing in The Cancer Genome Atlas (TCGA resource). Replicated mRNAs – mRNAs associated with expression of FGF1 in both the TRANScriptome of renaL humAn TissuE Study and TCGA; outermost circle – symbols of 126 mRNAs ordered in circular manner; first circle below – level of renal expression for each replicated partner mRNA (in  $\log_2$  TPM+1 values) whereby white – lowest expression and navy blue – highest expression; second circle below – level of co-expression (measured as  $\beta$ -coefficient from linear regression) between each partner mRNA and FGF1 mRNA whereby dark brown – strong positive co-expression and beige – weak positive co-expression; third circle below – level of statistical significance (measured as  $-\log_{10}$  P-value from linear regression) for co-expression between each partner mRNA and FGF1 mRNA, whereby white – strong statistical significance and pink – weak statistical significance; most inner circle – level of connectivity of partner mRNAs whereby dark red – highly connective mRNAs, orange – mRNAs with low connectivity; inside – co-expression between selected mRNAs relevant to blood pressure regulation.

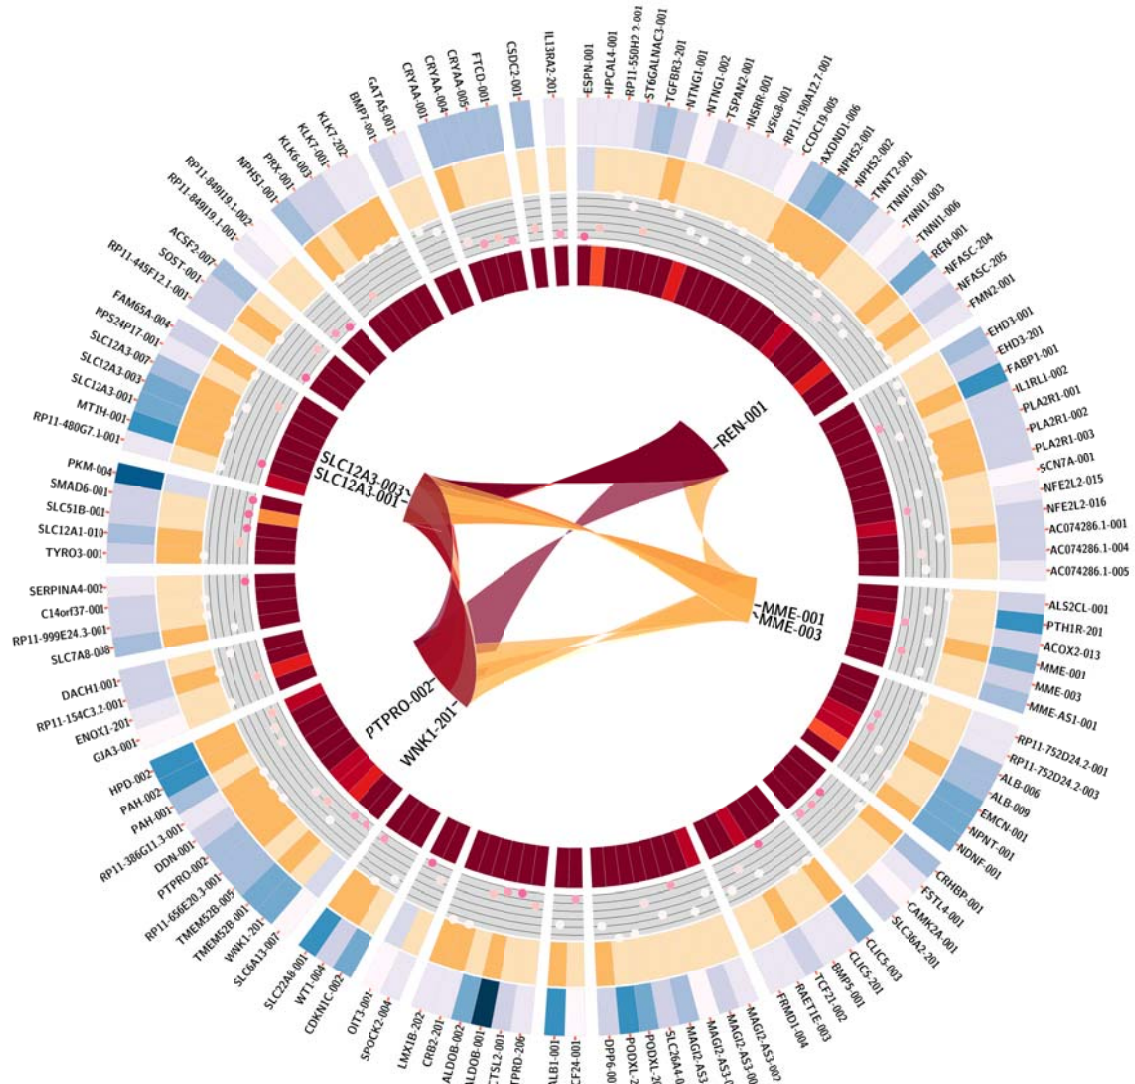

Figure S4. A total of 126 mRNAs co-expressed with FGF1 in the human kidney – consistency in the magnitude of regression  $\beta$ -coefficients (a measure of association of FGF1 mRNA with partner mRNAs) between the discovery population (TRANScriptome of renaL humAn TissuE – TRANSLATE Study) and the replication resource (The Cancer Genome Atlas – TCGA),  $\log_2$  TPM+1 – unit of expression from next-generation RNA-sequencing.

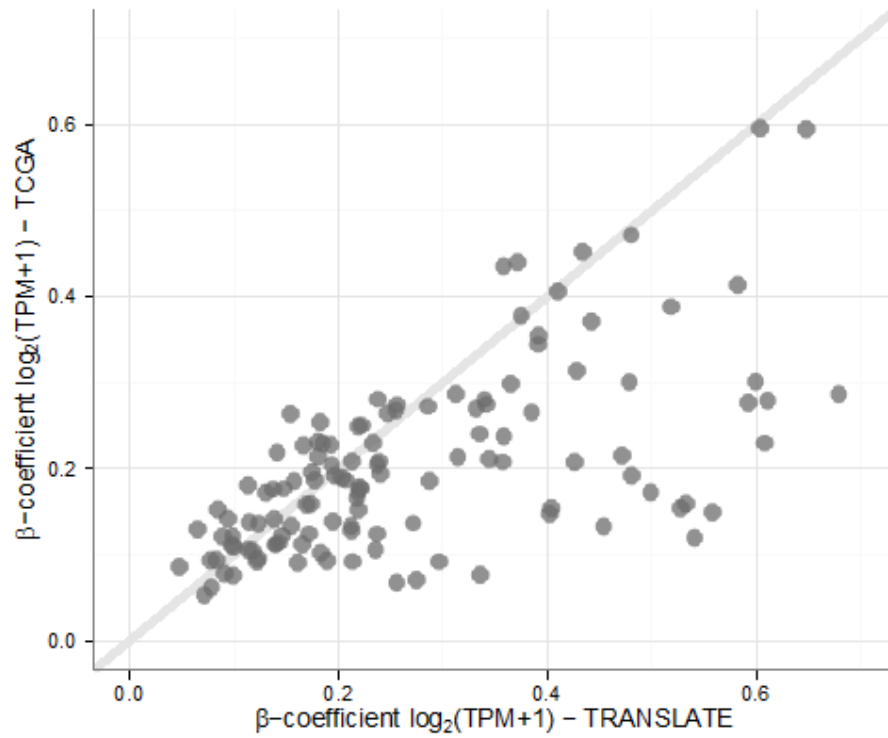

## References

1. Tomaszewski M, Charchar FJ, Barnes T, Gawron-Kiszka M, Sedkowska A, Podolecka E, Kowalczyk J, Rathbone W, Kalarus Z, Grzeszczak W, Goodall AH, Samani NJ, Zukowska-Szczechowska E: A common variant in low-density lipoprotein receptor-related protein 6 gene (LRP6) is associated with LDL-cholesterol. *Arterioscler Thromb Vasc Biol* 29: 1316–1321, 2009
2. Tomaszewski M, Charchar FJ, Nelson CP, Barnes T, Denniff M, Kaiser M, Debiec R, Christofidou P, Rafelt S, van der Harst P, Wang WY, Maric C, Zukowska-Szczechowska E, Samani NJ: Pathway analysis shows association between FGFBP1 and hypertension. *J Am Soc Nephrol* 22: 947-955, 2011
3. Harrap SB, Stebbing M, Hopper JL, Hoang HN, Giles GG: Familial patterns of covariation for cardiovascular risk factors in adults: the Victorian Family Heart Study. *Am J Epidemiol* 152: 704-715, 2000
4. Pinto-Sietsma SJ, Janssen WM, Hillege HL, Navis G, De Zeeuw D, De Jong PE: Urinary albumin excretion is associated with renal functional abnormalities in a nondiabetic population. *J Am Soc Nephrol* 11:1882-1888, 2000
5. Hillege HL, Fidler V, Diercks GF, van Gilst WH, de Zeeuw D, van Veldhuisen DJ, Gans RO, Janssen WM, Grobbee DE, de Jong PE; Prevention of Renal and Vascular End Stage Disease (PREVEND) Study Group: Urinary albumin excretion predicts cardiovascular and noncardiovascular mortality in general population. *Circulation* 106: 1777-1782, 2002
6. Tobin MD, Tomaszewski M, Braund PS, Hajat C, Raleigh SM, Palmer TM, Caulfield M, Burton PR, Samani NJ: Common variants in genes underlying monogenic hypertension and hypotension and blood pressure in the general population. *Hypertension* 51: 1658-1664, 2008
7. Tomaszewski M, Debiec R, Braund PS, Nelson CP, Hardwick R, Christofidou P, Denniff M, Codd V, Rafelt S, van der Harst P, Waterworth D, Song K, Vollenweider P, Waeber G, Zukowska-Szczechowska E, Burton PR, Mooser V, Charchar FJ, Thompson JR, Tobin MD, Samani NJ: Genetic architecture of ambulatory blood pressure in the general population: insights from cardiovascular gene-centric array. *Hypertension* 56: 1069-1076, 2010
8. Charchar FJ, Tomaszewski M, Lacka B, Zakrzewski J, Zukowska-Szczechowska E, Grzeszczak W, Dominiczak AF: Association of the human Y chromosome with cholesterol levels in the general population. *Arterioscler Thromb Vasc Biol* 24: 308-312, 2004
9. International Consortium for Blood Pressure Genome-Wide Association Studies: Genetic variants in novel pathways influence blood pressure and cardiovascular disease risk. *Nature* 478: 103-109, 2011
10. Tomaszewski M, Charchar FJ, Lynch MD, Padmanabhan S, Wang WY, Miller WH, Grzeszczak W, Maric C, Zukowska-Szczechowska E, Dominiczak AF: Fibroblast growth factor 1 gene and hypertension: from the quantitative trait locus to positional analysis. *Circulation* 116: 1915-1924, 2007
11. Purcell S, Neale B, Todd-Brown K, Thomas L, Ferreira MA, Bender D, Maller J, Sklar P, de Bakker PI, Daly MJ, Sham PC: PLINK: A tool set for whole-genome association and population-based linkage analyses. *Am J Hum Genet* 81: 559-575, 2007
12. Loukola A, Wedenoja J, Keskitalo-Vuokko K, Broms U, Korhonen T, Ripatti S, Sarin AP, Pitkäniemi J, He L, Häppölä A, Heikkilä K, Chou YL, Pergadia ML, Heath AC, Montgomery GW, Martin NG, Madden PA, Kaprio J: Genome-wide association study on detailed profiles of smoking behavior and nicotine dependence in a twin sample. *Mol Psychiatry* 19: 615-624, 2014

13. Zhou X, Stephens M: Genome-wide efficient mixed-model analysis for association studies. *Nat Genet* 44: 821-824, 2012
14. Livak KJ, Schmittgen TD: Analysis of relative gene expression data using real-time quantitative PCR and the 2(-Delta Delta C(T)) method. *Methods* 25: 402-408, 2001
15. <http://www.roadmapepigenomics.org/>
16. ENCODE Project Consortium: An integrated encyclopedia of DNA elements in the human genome. *Nature* 489: 57-74, 2012
17. Andrews S. FastQC, <http://www.bioinformatics.babraham.ac.uk/projects/fastqc/>.
18. 't Hoen PA, Friedländer MR, Almlöf J, Sammeth M, Pulyakhina I, Anvar SY, Laros JF, Buermans HP, Karlberg O, Brännvall M; GEUVADIS Consortium, den Dunnen JT, van Ommen GJ, Gut IG, Guigó R, Estivill X, Syvänen AC, Dermitzakis ET, Lappalainen T. Reproducibility of high-throughput mRNA and small RNA sequencing across laboratories. *Nat Biotechnol* 31: 1015-1022, 2013
19. Lappalainen T, Sammeth M, Friedländer MR, 't Hoen PA, Monlong J, Rivas MA, González-Porta M, Kurbatova N, Griebel T, Ferreira PG, Barann M, Wieland T, Greger L, van Iterson M, Almlöf J, Ribeca P, Pulyakhina I, Esser D, Giger T, Tikhonov A, Sultan M, Bertier G, MacArthur DG, Lek M, Lizano E, Buermans HP, Padioleau I, Schwarzmayer T, Karlberg O, Ongen H, Kilpinen H, Beltran S, Gut M, Kahlem K, Amstislavskiy V, Stegle O, Pirinen M, Montgomery SB, Donnelly P, McCarthy MI, Flicek P, Strom TM; Geuvadis Consortium, Lehrach H, Schreiber S, Sudbrak R, Carracedo A, Antonarakis SE, Häsler R, Syvänen AC, van Ommen GJ, Brazma A, Meitinger T, Rosenstiel P, Guigó R, Gut IG, Estivill X, Dermitzakis ET. Transcriptome and genome sequencing uncovers functional variation in humans. *Nature* 501: 506-511, 2013
20. Krzywinski M, Schein J, Birol I, Connors J, Gascoyne R, Horsman D, Jones SJ, Marra MA: Circos: an information aesthetic for comparative genomics. *Genome Res* 19: 1639-1645, 2009
21. Lindenmeyer MT, Eichinger F, Sen K, Anders HJ, Edenhofer I, Mattinzoli D, Kretzler M, Rastaldi MP, Cohen CD: Systematic analysis of a novel human renal glomerulus-enriched gene expression dataset. *PLoS One* 5: e11545, 2010
22. Chabardès-Garonne D, Mejéan A, Aude JC, Cheval L, Di Stefano A, Gaillard MC, Imbert-Teboul M, Wittner M, Balian C, Anthouard V, Robert C, Ségurens B, Wincker P, Weissenbach J, Doucet A, Elalouf JM: A panoramic view of gene expression in the human kidney. *Proc Natl Acad Sci U S A* 100: 13710-13715, 2003
23. He L, Sun Y, Takemoto M, Norlin J, Tryggvason K, Samuelsson T, Betsholtz C: The glomerular transcriptome and a predicted protein-protein interaction network. *J Am Soc Nephrol* 19: 260-268, 2008
24. Nyström J, Fierlbeck W, Granqvist A, Kulak SC, Ballermann BJ: A human glomerular SAGE transcriptome database. *BMC Nephrol* 10: 13, 2009
